# Supplementary material
Source: publisher figshare collection journal article supplement (https://gsapubs.figshare.com/ndownloader/files/40707890)
Supplement: Supplementary file 1 [file 40707890]

## Sheet: Sheet1
Item S3: Major- and minor-element electron-microprobe analyses (EMA) of individual glass shards of tephra beds of the Ibex Hollow Tuff at its type locality, at Trapper Creek, ID, and of underlying and overlying tephra layers at this locality, and of tephra layers at distal sites correlated to the Ibex Hollow Tuff, U.S. Geological Survey, Tephrochronology Laboratory, Menlo Park, CA, USA. Analyses …														Sarna-Wojcicki, A.M., Knott, J.R., Westgate, J.A., Budahn, J.R., Barron, J., Bray, C.J., Ludvigson, G.A., Meyer, C.E., Miller, D.M., Otto, R.E., Pearce, N.J.G., Smith, C.C., Walkup, L.C., Wan, E., and Yount, J., 2023, Ibex Hollow Tuff from ca. 12 Ma supereruption, southern Idaho, identified across North America, eastern Pacific Ocean, and Gulf of Mexico: Geosphere, v. 19, https://doi.org/10.1130/…
8900 microprobe.
Site 1, Trapper Creek, ID
Sample-Coignimbritic? Ash	No.	Na2O	MgO	Al2O3	SiO2	K2O	CaO	TiO2	MnO	FeO	Total		FeO	Fe2O3
TC89022A, 1	161	2.434	0.07	11.341	71.743	5.834	0.582	0.157	0.057	1.678	93.896		1.678	1.86426
TC89022A, 2	162	2.389	0.063	11.371	71.239	5.735	0.579	0.208	0.027	1.669	93.28		1.669	1.85426
TC89022A, 3	163	2.47	0.054	11.5	71.28	5.621	0.595	0.176	0	1.934	93.63		1.934	2.14867
TC89022A, 4	164	2.287	0.053	11.491	70.123	5.894	0.784	0.32	0.047	1.968	92.967		1.968	2.18645
TC89022A, 5	165	2.407	0.066	11.526	70.424	5.842	0.69	0.192	0.048	1.92	93.115		1.92	2.13312
TC89022A, 6	167	2.151	0.069	11.433	71.56	5.944	0.635	0.247	0	1.945	93.984		1.945	2.1609
TC89022A, 7	168	2.325	0.063	11.409	71.19	5.867	0.589	0.181	0.039	1.863	93.526		1.863	2.06979
TC89022A, 8	169	2.188	0.057	11.19	70.991	6.006	0.548	0.222	0.006	1.584	92.792		1.584	1.75982
TC89022A, 9	170	2.204	0.044	11.279	71.338	6.149	0.621	0.341	0.024	1.803	93.803		1.803	2.00313
TC89022A, 10	171	2.169	0.073	11.35	71.703	5.925	0.549	0.157	0	1.658	93.584		1.658	1.84204
TC89022A, 11	172	2.061	0.051	11.182	71.174	5.899	0.545	0.199	0.048	1.741	92.9		1.741	1.93425
TC89022A, 12	173	2.498	0.063	11.235	70.846	5.599	0.573	0.288	0.001	1.786	92.889		1.786	1.98425
TC89022A, 13	174	2.18	0.081	11.347	70.85	6.012	0.588	0.205	0.012	1.956	93.231		1.956	2.17312
TC89022A, 14	175	2.525	0.034	11.049	71.57	5.619	0.55	0.219	0.016	1.777	93.359		1.777	1.97425
TC89022A, 15	176	2.094	0.053	11.245	71.176	5.937	0.594	0.203	0.006	1.706	93.014		1.706	1.89537
TC89022A, 16	177	2.31	0.085	11.418	70.258	5.849	0.663	0.208	0.033	2.01	92.834		2.01	2.23311
TC89022A, 17	178	2.231	0.05	11.161	71.531	5.97	0.539	0.187	0.017	1.585	93.271		1.585	1.76093
TC89022A, 18	179	2.185	0.047	11.041	71.32	5.89	0.521	0.206	0.048	1.691	92.949		1.691	1.8787
TC89022A, 19	182	2.034	0.074	11.221	70.186	6.099	0.633	0.169	0.015	1.749	92.18		1.749	1.94314
TC89022A, 20	184	2.198	0.058	11.207	71.052	6.108	0.589	0.193	0.045	1.711	93.161		1.711	1.90092
TC89022A, 21	185	2.329	0.054	11.289	70.892	5.757	0.567	0.232	0.056	1.644	92.82		1.644	1.82648
not used	166	1.942	0.064	11.336	70.518	6.287	0.614	0.148	0	1.849	92.758		1.849	2.05424
not used	180	1.461	0.014	11.282	71.823	5.413	0.578	0.21	0.02	1.605	92.406		1.605	1.78316
not used	181	1.701	0.056	11.13	71.819	6.162	0.594	0.237	0	1.615	93.314		1.615	1.79426
not used	183	1.817	0.063	11.425	70.925	6.237	0.634	0.264	0.013	1.79	93.168		1.79	1.98869
														1.97747	less"not used"
	Mean	2.26995	0.0600952	11.2993	71.0689	5.88362	0.596857	0.214762	0.0259524	1.7799	93.1993			0.147058	"less not used"
	Std Dev.	0.143711	0.0125296	0.137949	0.484324	0.154671	0.0601226	0.0487872	0.020358	0.132365	0.434256
	Count: 21
Site 1, Trapper Creek, ID
Sample-Ash flow	No.	Na2O	MgO	Al2O3	SiO2	K2O	CaO	TiO2	MnO	FeO	Total
TC89-21A T589-5 1	361	1.8364	0.0566	11.5831	72.3552	5.4047	0.5806	0.2379	0.0123	1.5541	93.621
TC89-21A T589-5 2	362	1.7713	0.0254	11.5154	71.8647	5.3901	0.6044	0.2399	0.0303	1.6483	93.0899
TC89-21A T589-5 3	363	1.7391	0.0371	11.4345	71.9404	5.4628	0.5815	0.2501	0.0269	1.613	93.0854
TC89-21A T589-5 4	364	1.4846	0.0722	11.5924	70.8423	5.6094	0.6738	0.248	0.0392	1.8868	92.4487
TC89-21A T589-5 5	365	1.4977	0.063	11.2896	71.4174	5.4969	0.5636	0.2278	0.0381	1.7014	92.2956
TC89-21A T589-5 6	366	1.5144	0.0441	11.7611	72.2851	5.7853	0.5814	0.2137	0.0039	1.5629	93.752
TC89-21A T589-5 7	367	1.7518	0.056	11.5717	71.4229	5.0294	0.6258	0.252	0.0499	1.7485	92.508
TC89-21A T589-5 8	368	1.6829	0.0462	11.4613	71.574	5.6146	0.5914	0.2157	0.0454	1.663	92.8946
TC89-21A T589-5 9	369	1.418	0.0487	11.5157	71.8532	5.7922	0.5822	0.2258	0.0275	1.7043	93.1676
TC89-21A T589-5 10	370	1.8567	0.0743	11.5586	71.5805	5.1285	0.695	0.254	0.0263	1.8575	93.0315
TC89-21A T589-5 11	371	1.7235	0.0492	11.5888	72.1473	5.5967	0.6083	0.1975	0.0258	1.6027	93.5399
TC89-21A T589-5 12	372	1.1587	0.0509	11.5428	71.9738	5.4275	0.5553	0.1792	0.0135	1.6531	92.5548
TC89-21A T589-5 13	373	1.4782	0.0375	11.4796	71.9524	5.8015	0.6104	0.2036	0.0224	1.585	93.1706
TC89-21A T589-5 14	374	1.5179	0.0861	11.3821	72.1928	5.8816	0.6215	0.2158	0.0146	1.6174	93.5299
TC89-21A T589-5 15	375	1.8818	0.0735	11.4458	71.6893	5.3535	0.6557	0.2743	0.0078	1.8147	93.1964
TC89-21A T589-5 16	376	1.7074	0.0519	11.5403	72.117	5.4997	0.5629	0.1913	0.0644	1.7205	93.4554
TC89-21A T589-5 17	377	1.6673	0.0458	11.4239	72.1487	5.5224	0.5755	0.2424	0.0187	1.6962	93.3409
TC89-21A T589-5 18	378	1.9296	0.0501	11.6016	71.6003	5.0381	0.6297	0.2256	0.0577	1.8824	93.0152
TC89-21A T589-5 19	379	1.7142	0.0545	11.5637	71.0491	5.0915	0.6478	0.2782	0.0633	1.7911	92.2534
TC89-21A T589-5 20	380	1.9212	0.0298	11.7653	71.8239	5.1661	0.647	0.2479	0.0487	1.8294	93.4793
	Mean	1.66264	0.052645	11.5309	71.7915	5.45463	0.60969	0.231035	0.031835	1.70661	93.0715
	Std. Dev., 1s	0.197091	0.0153506	0.113051	0.400057	0.261326	0.0391699	0.0263899	0.0182883	0.106749	0.452814
	Count 20
Site 7E, Mobile Bay, AL
Sample	Shard No.	Na2O	MgO	Al2O3	SiO2	K2O	CaO	TiO2	MnO	FeO	Total
Boswell selected*	63	3.826	0.064	11.628	71.062	3.007	0.589	0.255	0.041	1.725	92.197
Boswell selected*	64	3.954	0.058	11.72	70.987	2.833	0.654	0.241	0.042	1.794	92.283
Boswell selected*	65	3.682	0.054	11.782	71.345	2.763	0.623	0.223	0.042	1.96	92.474
Boswell selected*	66	3.783	0.06	11.672	71.071	2.717	0.647	0.232	0	1.894	92.076
Boswell selected*	67	3.708	0.075	11.695	71.184	3.548	0.612	0.263	0.027	1.814	92.926
Boswell selected*	69	3.49	0.065	11.532	71.024	4.056	0.641	0.175	0.044	1.841	92.868
Boswell selected*	70	3.726	0.063	11.521	70.791	3.432	0.61	0.218	0.028	1.936	92.325
Boswell selected*	71	3.443	0.03	11.36	70.872	4.222	0.671	0.287	0.057	2.309	93.251
Boswell selected*	72	3.882	0.061	11.777	72.943	3.285	0.54	0.177	0.028	1.519	94.212
Boswell selected*	74	3.96	0.067	11.607	70.897	3.141	0.62	0.236	0.015	1.929	92.472
Boswell selected*	76	3.674	0.046	11.558	72.132	2.858	0.58	0.209	0.041	1.634	92.732
Boswell selected*	77	4.052	0.047	11.62	71.068	3.197	0.65	0.264	0.006	1.703	92.607
Boswell selected*	78	3.529	0.064	11.559	71.423	3.946	0.637	0.211	0.052	1.857	93.278
Boswell selected*	79	3.696	0.073	11.593	70.962	3.077	0.606	0.234	0.032	1.77	92.043
Boswell selected*	80	3.761	0.065	11.525	71.804	3.655	0.65	0.213	0.033	1.614	93.32
Boswell selected*	81	3.79	0.073	11.469	70.377	3.222	0.651	0.236	0.025	1.841	91.684
Boswell selected*	82	3.853	0.067	11.436	70.869	2.843	0.546	0.193	0	1.67	91.477
Boswell selected*	83	3.819	0.062	11.516	70.712	2.965	0.606	0.216	0.043	1.81	91.749
Boswell selected*	84	3.784	0.058	11.543	70.754	3.407	0.693	0.245	0.012	1.891	92.387
Boswell selected*	85	3.758	0.045	11.419	71.898	3.53	0.571	0.222	0.008	1.747	93.198
Boswell selected*	86	3.898	0.052	11.345	70.678	2.952	0.552	0.178	0.007	1.837	91.499
Boswell selected*	87	3.64	0.059	11.698	71.092	3.121	0.595	0.188	0.026	1.916	92.335
Boswell selected*	88	3.762	0.048	11.552	72.1	3.719	0.549	0.192	0.05	1.773	93.745
Boswell selected*	89	3.952	0.057	11.59	70.608	2.943	0.623	0.225	0.024	1.85	91.872
Boswell selected*	90	3.577	0.05	11.477	71.734	4.094	0.596	0.222	0.014	1.701	93.465
Boswell selected*	91	3.793	0.06	11.593	71.133	3.229	0.629	0.254	0.026	1.899	92.616
Boswell selected*	92	3.968	0.053	11.572	70.838	3.123	0.642	0.307	0.022	2.075	92.6
Boswell selected*	93	3.939	0.058	11.687	70.352	3.181	0.623	0.257	0.067	1.751	91.915
Boswell selected*	94	3.817	0.069	11.475	70.722	3.085	0.624	0.217	0.017	1.805	91.831
Boswell selected*	95	3.944	0.048	11.643	71.023	3.06	0.647	0.277	0.045	1.862	92.549
Boswell selected*	96	3.778	0.063	11.628	70.542	3.005	0.668	0.269	0.048	1.912	91.913
Boswell selected*	97	3.336	0.067	11.663	70.801	2.291	0.656	0.252	0.018	1.855	90.939
Boswell selected*	98	3.529	0.046	11.703	70.52	2.535	0.678	0.322	0.018	2.011	91.362
Boswell selected*	99	4.388	0.016	12.402	70.207	2.994	0.461	0.174	0.087	1.681	92.41
Boswell selected*	100	3.933	0.07	11.517	70.578	2.824	0.607	0.241	0.015	1.748	91.533
Boswell selected*	101	3.841	0.072	11.835	70.67	3.285	0.619	0.297	0.045	1.923	92.587
Boswell selected*	102	3.806	0.07	11.509	70.864	3.364	0.605	0.295	0.021	1.747	92.281
Boswell selected*	103	3.897	0.074	11.432	71.728	2.829	0.573	0.244	0.031	1.67	92.478
Boswell selected*	104	3.832	0.074	11.491	70.378	3.355	0.673	0.245	0	1.779	91.827
Boswell selected*	105	3.378	0.069	11.419	68.571	4.084	0.621	0.192	0.047	1.858	90.239
Boswell selected*	106	3.682	0.064	11.408	70.694	3.002	0.561	0.237	0	1.734	91.382
Boswell selected*	107	3.78	0.059	11.379	70.713	3.005	0.604	0.169	0.031	1.657	91.397
Boswell selected*	108	3.745	0.061	11.491	70.421	3.566	0.684	0.235	0.031	1.807	92.041
Boswell selected*	109	3.542	0.042	11.613	70.191	3.722	0.678	0.241	0.025	1.891	91.945
Boswell selected*	110	3.649	0.05	11.655	70.6	3.657	0.622	0.25	0	1.89	92.373
Boswell selected*	111	3.809	0.064	11.764	70.684	2.815	0.65	0.248	0.016	1.937	91.987
Boswell selected*	112	3.953	0.043	11.62	71.816	2.923	0.646	0.242	0.061	1.688	92.992
Boswell selected*	113	3.639	0.053	11.671	71.556	3.851	0.589	0.276	0.024	1.865	93.524
Boswell selected*	114	4.085	0.081	11.476	71.078	2.819	0.635	0.241	0.019	1.902	92.336
Boswell selected*	116	3.648	0.071	11.433	70.361	3.683	0.628	0.257	0.015	2.001	92.097
Boswell selected*	117	4.001	0.073	11.688	71.356	3.255	0.696	0.251	0.055	1.93	93.305
Boswell selected*	118	3.956	0.067	11.514	70.933	3.377	0.635	0.215	0.027	1.898	92.622
Boswell selected*	119	3.784	0.073	11.733	71.712	3.284	0.677	0.242	0	1.888	93.393
Boswell selected*	120	3.781	0.055	11.543	71.186	3.416	0.605	0.181	0.035	1.821	92.623
Boswell selected*	122	3.696	0.061	11.436	71.256	2.666	0.529	0.172	0.047	1.664	91.527
Boswell selected*	123	3.948	0.044	11.365	71.207	3.311	0.563	0.218	0.043	1.646	92.345
Boswell selected*	124	3.715	0.067	11.575	71.258	3.822	0.644	0.261	0.07	2.015	93.427
Boswell selected*	125	3.958	0.06	11.632	70.677	2.887	0.625	0.225	0	1.903	91.967
Boswell selected*	126	3.277	0.07	11.742	71.419	2.358	0.678	0.243	0.063	1.794	91.644
Boswell selected*	127	3.777	0.047	11.542	71.675	2.747	0.602	0.199	0.015	1.598	92.202
Boswell selected*	128	3.704	0.05	11.525	71.217	2.8	0.638	0.194	0.042	1.915	92.085
Boswell selected*	129	3.855	0.035	11.491	71.619	2.7	0.541	0.206	0.006	1.663	92.116
Boswell selected*	130	3.816	0.072	11.657	71.141	3.548	0.625	0.229	0.003	1.784	92.875
Boswell selected*	132	3.873	0.047	11.6	71.059	2.94	0.611	0.259	0	1.847	92.236
Boswell selected*	133	3.397	0.028	11.538	71.347	4.281	0.624	0.206	0.021	1.804	93.246
Boswell selected*	134	4.194	0.031	11.511	71.722	3.037	0.507	0.252	0.044	1.514	92.812
Boswell selected*	135	3.308	0.072	11.546	70.939	4.301	0.705	0.35	0.098	2.177	93.496
Boswell selected*	136	3.934	0.078	11.502	70.897	3.156	0.64	0.22	0.076	1.921	92.424
Boswell selected*	137	3.998	0.064	11.604	71.021	2.91	0.585	0.217	0.033	1.778	92.21
Boswell selected*	138	3.842	0.062	11.725	71.817	3.375	0.607	0.341	0.022	1.801	93.592
Boswell selected*	139	3.781	0.068	11.605	71.208	2.746	0.643	0.232	0.028	1.874	92.185
Boswell selected*	140	3.911	0.069	11.573	71.05	2.693	0.668	0.287	0	1.896	92.147
Boswell selected*	141	4.004	0.081	11.663	70.948	3.304	0.665	0.211	0.048	1.791	92.715
Boswell selected*	142	3.727	0.071	11.451	70.477	3.533	0.617	0.178	0.048	1.778	91.88
Boswell selected*	143	3.793	0.048	11.357	70.44	3.446	0.596	0.268	0.091	1.841	91.88
Boswell selected*	144	3.764	0.061	11.63	70.817	3.579	0.6	0.293	0.064	1.863	92.671
Boswell selected*	145	3.918	0.064	11.768	71.048	2.881	0.616	0.271	0.007	1.916	92.489
Boswell selected*	146	3.812	0.044	11.37	70.905	3.359	0.632	0.213	0.01	1.668	92.013
Boswell selected*	147	3.984	0.056	11.594	70.753	3.254	0.671	0.236	0.073	1.975	92.596
Boswell selected*	148	3.85	0.053	11.358	71.471	2.89	0.578	0.23	0.042	1.688	92.16
Boswell selected*	149	3.778	0.069	11.514	70.805	3.425	0.604	0.209	0.035	1.776	92.215
Boswell selected*	151	3.898	0.095	11.723	70.291	3.001	0.671	0.28	0.01	1.784	91.753
Boswell selected*	153	3.847	0.08	11.541	71.152	3.045	0.65	0.204	0.034	1.794	92.347
Boswell selected*	154	3.655	0.074	11.56	70.71	2.803	0.598	0.276	0.024	1.87	91.57
Boswell selected*	155	3.974	0.054	11.528	70.146	3.082	0.568	0.197	0.019	1.877	91.445
Boswell selected*	156	3.597	0.056	11.737	71.737	4.236	0.595	0.238	0.011	1.951	94.158
Boswell selected*	157	3.882	0.073	11.59	71.125	3.527	0.626	0.159	0.05	1.886	92.918
Boswell selected*	158	4.005	0.046	11.417	71.363	2.933	0.578	0.331	0.074	1.818	92.565
Boswell selected*	159	3.929	0.051	11.603	70.996	3.642	0.661	0.177	0.054	1.871	92.984
Boswell selected*	160	4.024	0.078	11.517	70.683	2.792	0.575	0.172	0	1.92	91.761
Boswell selected*	162	3.868	0.084	11.632	69.977	2.867	0.689	0.265	0.088	2.092	91.562
Boswell selected*	163	3.935	0.05	11.551	70.329	2.705	0.633	0.228	0.063	1.79	91.284
Boswell selected*	164	3.843	0.05	11.34	71.476	3.313	0.554	0.189	0.017	1.517	92.299
Boswell selected*	165	3.848	0.076	11.626	70.731	2.846	0.626	0.21	0.045	1.785	91.793
Boswell selected*	166	3.854	0.054	11.451	70.874	2.92	0.639	0.189	0.043	1.791	91.815
Boswell selected*	167	3.866	0.062	11.422	70.476	3.214	0.622	0.223	0.035	1.71	91.63
Boswell selected*	168	3.856	0.075	11.543	70.598	2.77	0.633	0.226	0.025	1.778	91.504
Boswell selected*	169	3.911	0.059	11.583	71.228	2.98	0.657	0.14	0.015	1.788	92.361
Boswell selected*	170	4.057	0.06	11.427	70.79	3.187	0.615	0.23	0.048	1.838	92.252
Boswell selected*	171	3.647	0.047	11.224	71.134	3.609	0.608	0.219	0.001	1.709	92.198
Boswell selected*	172	3.326	0.058	11.344	71.408	4.524	0.645	0.26	0.061	1.936	93.562
Boswell selected*	173	3.88	0.056	11.294	71.02	3.293	0.555	0.244	0.005	1.622	91.969
Boswell selected*	174	3.782	0.058	11.23	70.896	3.447	0.64	0.238	0.059	1.868	92.218
Boswell selected*	175	3.895	0.041	11.551	71.287	3.321	0.579	0.205	0	1.884	92.763
Boswell selected*	181	3.731	0.044	11.352	71.422	3.694	0.555	0.237	0.047	1.719	92.801
Boswell selected*	182	3.678	0.069	11.492	70.533	3.82	0.692	0.265	0.021	1.906	92.476
Boswell selected*	183	3.947	0.061	11.533	70.419	3.092	0.62	0.272	0.033	1.845	91.822
Boswell selected*	184	3.779	0.063	11.395	70.533	2.729	0.643	0.255	0.047	1.808	91.252
Boswell selected*	185	3.993	0.05	11.394	70.705	3.18	0.62	0.221	0.028	1.913	92.104
Boswell selected*	190	3.505	0.054	11.336	71.143	3.925	0.516	0.25	0.02	1.69	92.439
Boswell selected*	191	3.755	0.073	11.498	70.475	2.676	0.646	0.301	0.027	1.868	91.319
Boswell selected*	192	3.763	0.052	11.582	70.442	2.502	0.617	0.278	0	1.73	90.966
Boswell selected*	193	4.149	0.107	12.416	69.76	3.011	0.727	0.277	0.039	2.124	92.61
Boswell selected*	194	3.975	0.059	11.621	71.25	3.088	0.644	0.239	0.051	1.927	92.854
Boswell selected*	195	3.779	0.06	11.394	71.75	3.449	0.535	0.2	0	1.596	92.763
Boswell selected*	196	3.877	0.078	11.61	70.659	2.767	0.684	0.264	0.058	1.731	91.728
Boswell selected*	197	4.047	0.065	11.542	71.097	2.875	0.647	0.273	0.005	1.845	92.396
Boswell selected*	198	3.952	0.074	11.597	71.439	3.025	0.609	0.237	0.012	1.889	92.834
Boswell selected*	199	3.895	0.057	11.544	70.955	2.861	0.646	0.223	0	1.834	92.015
Boswell selected*	202	3.906	0.052	11.422	71.497	3.006	0.554	0.23	0	1.704	92.371
Boswell selected*	203	3.635	0.066	11.622	71.023	2.329	0.714	0.313	0.032	1.955	91.689
Boswell selected*	204	3.994	0.052	11.382	71.299	3.084	0.536	0.257	0.037	1.692	92.333
Boswell selected*	206	3.779	0.071	11.597	70.674	2.725	0.655	0.227	0.057	1.715	91.5
Boswell selected*	207	3.917	0.058	11.442	70.579	3.133	0.557	0.189	0	1.559	91.434
Boswell selected*	208	3.98	0.04	11.432	70.126	3.084	0.565	0.211	0.023	1.665	91.126
Boswell selected*	209	3.934	0.048	11.454	69.736	2.87	0.587	0.191	0.003	1.706	90.529
Boswell selected*	211	3.966	0.067	11.659	70.626	3.08	0.62	0.262	0.066	1.877	92.223
Boswell selected*	212	4.054	0.066	11.456	70.616	2.897	0.51	0.243	0	1.655	91.497
Boswell selected*	213	3.873	0.044	11.586	71.075	2.84	0.58	0.232	0.063	1.601	91.894
Boswell selected*	214	3.886	0.058	11.502	71.199	3.323	0.573	0.195	0.036	1.648	92.42
Boswell selected*	215	3.883	0.06	11.36	70.437	3.431	0.625	0.179	0.069	1.857	91.901
Boswell selected*	216	3.816	0.081	11.606	70.292	3.324	0.602	0.257	0.04	1.829	91.847
Boswell selected*	217	3.963	0.061	11.625	70.856	3.306	0.626	0.199	0.036	1.823	92.495
	Mean	3.81681	0.0603534	11.5527	70.9463	3.19011	0.617173	0.234436	0.0316015	1.81429	92.2637
	Std. Dev.	0.177851	0.0130496	0.160108	0.537189	0.426669	0.0461573	0.0382118	0.0231117	0.128258	0.683671
*From T-320, T-324	Count	133	133	133	133	133	133	133	133	133	133
Site 10W
Sample	No.	Na2O	MgO	Al2O3	SiO2	K2O	CaO	TiO2	MnO	FeO	Total
DPB-12, T211-3	56	2.289	0.055	11.181	71.047	2.967	0.633	0.234	0.046	1.732	90.184
DPB-12, T211-4	57	2.591	0.053	11.312	69.942	4.724	0.629	0.239	0.057	1.742	91.289
DPB-12, T211-5	58	2.311	0.074	11.264	71.043	3.625	0.579	0.17	0.033	1.798	90.897
DPB-12, T211-6	59	2.328	0.063	11.147	70.85	3.673	0.547	0.225	0.042	1.687	90.562
DPB-12, T211-7	60	2.461	0.087	11.427	70.508	3.979	0.592	0.193	0.063	1.881	91.191
DPB-12, T211-8	61	2.378	0.059	11.237	70.443	4.069	0.635	0.281	0.012	1.95	91.064
DPB-12, T211-9	62	2.053	0.059	11.189	70.979	2.389	0.607	0.246	0.035	1.842	89.399
DPB-12, T211-10	63	2.542	0.059	11.376	70.928	3.838	0.669	0.274	0.01	1.853	91.549
DPB-12, T211-11	64	2.467	0.063	11.138	70.467	4.027	0.665	0.21	0.047	1.83	90.914
DPB-12, T211-12	65	2.079	0.058	11.081	71.083	2.621	0.61	0.262	0.064	1.688	89.546
DPB-12, T211-13	66	2.765	0.076	11.174	70.786	4.566	0.613	0.255	0	1.736	91.971
DPB-12, T211-14	67	2.47	0.05	11.222	70.801	3.61	0.572	0.202	0.031	1.621	90.579
DPB-12, T211-15	68	2.544	0.048	11.135	70.76	3.943	0.56	0.204	0.01	1.73	90.934
DPB-12, T211-16	69	1.8	0.044	11.213	70.109	1.841	0.623	0.22	0.018	1.905	87.773
DPB-12, T211-17	70	2.652	0.067	11.426	70.313	4.389	0.613	0.188	0.005	1.659	91.312
DPB-12, T211-18	71	2.302	0.086	11.14	71.247	3.713	0.605	0.276	0.03	1.652	91.051
DPB-12, T211-19	72	1.775	0.075	11.218	70.767	1.991	0.631	0.289	0.035	1.834	88.615
DPB-12, T211-20	73	2.694	0.059	11.109	71.152	4.125	0.58	0.198	0.047	1.698	91.662
DPB-12, T211-21	74	2.799	0.062	11.104	70.491	4.463	0.534	0.225	0.036	1.565	91.279
DPB-12, T211-22	75	2.487	0.063	11.211	70.377	3.921	0.59	0.275	0.061	1.789	90.774
	Mean	2.38935	0.063	11.2152	70.7047	3.6237	0.60435	0.2333	0.0341	1.7596	90.6272
	Std Dev.	0.285413	0.0116167	0.101401	0.358701	0.832843	0.035776	0.0353257	0.0198226	0.101553	1.05364
	Count: 20
Site 7E
Sample	No.	Na2O	MgO	Al2O3	SiO2	K2O	CaO	TiO2	MnO	FeO	Total
ORCHARD-N1 T615-2 24	72	0.8364	0.0512	11.0894	69.9529	6.5222	0.5997	0.1891	0.0054	1.51384	90.7602
ORCHARD-N1 T615-2 26	74	1.1025	0.0263	11.3017	70.8349	6.6188	0.6497	0.2321	0.1193	1.79675	92.682
ORCHARD-N1 T615-2 23	71	0.7999	0.0696	11.3241	70.4811	6.1823	0.6382	0.1889	0.0868	1.75576	91.5266
ORCHARD-N1 T615-2 22	70	1.16	0.0682	11.3304	70.1082	6.6788	0.6815	0.2052	0.0868	1.93994	92.2591
ORCHARD-N1 T615-2 17	65	1.3949	0.0421	11.3727	70.4155	6.5388	0.662	0.2486	0.0543	1.90616	92.6351
ORCHARD-N1 T615-2 10	58	0.7805	0.0537	11.4064	71.2538	6.4543	0.603	0.2064	0.06	1.69551	92.5136
ORCHARD-N1 T615-2 27	75	0.9576	0.0376	11.4559	71.6267	6.8273	0.6643	0.2265	0.1029	1.87478	93.7736
ORCHARD-N1 T615-2 1	49	1.4313	0.0608	11.4828	71.1324	6.316	0.6707	0.2721	0	1.54961	92.9157
ORCHARD-N1 T615-2 11	59	1.127	0.0547	11.4842	70.4022	6.6665	0.6326	0.2225	0.0709	1.77657	92.4372
ORCHARD-N1 T615-2 5	53	1.2339	0.0571	11.5095	70.8559	6.6357	0.5969	0.2552	0.0709	1.78117	92.9962
ORCHARD-N1 T615-2 7	55	1.3841	0.0526	11.5108	70.4371	6.2472	0.6335	0.1463	0	1.88189	92.2935
ORCHARD-N1 T615-2 13	61	1.6213	0.0735	11.5127	69.5467	6.032	0.6793	0.1951	0.0545	1.74833	91.4635
ORCHARD-N1 T615-2 15	63	0.6117	0.0284	11.5226	70.6546	6.4697	0.6509	0.3138	0.1468	1.90511	92.3036
ORCHARD-N1 T615-2 16	64	1.1229	0.0594	11.5364	70.0108	6.6348	0.6345	0.1624	0.0598	1.73348	91.9545
ORCHARD-N1 T615-2 2	50	1.1939	0.0502	11.6251	71.3248	6.5783	0.6159	0.2715	0.0491	1.76349	93.4723
ORCHARD-N1 T615-2 28	76	0.7312	0.0518	11.6273	71.646	6.4198	0.5776	0.3777	0.0108	1.98889	93.431
ORCHARD-N1 T615-2 21	69	0.7267	0.0731	11.6358	70.3824	6.3036	0.6419	0.319	0	1.78253	91.865
ORCHARD-N1 T615-2 6	54	1.3105	0.0739	11.6814	71.8361	6.7679	0.6558	0.1844	0.0654	2.02874	94.6042
ORCHARD-N1 T615-2 12	60	1.2173	0.06	11.7217	71.1028	6.6129	0.6494	0.1951	0.0654	1.91139	93.536
ORCHARD-N1 T615-2 4	52	0.7928	0.0543	11.728	72.528	6.2936	0.6268	0.3421	0	1.8115	94.1771
ORCHARD-N1 T615-2 18	66	1.2805	0.0921	11.7566	69.9634	6.6025	0.7295	0.2486	0.0706	2.10394	92.8477
ORCHARD-N1 T615-2 9	57	1.0522	0.0624	11.8041	71.5902	6.7798	0.6707	0.2772	0	2.00269	94.2393
ORCHARD-N1 T615-2 20	68	0.7619	0.0453	11.8118	72.7215	6.3394	0.703	0.3241	0	1.89047	94.5975
ORCHARD-N1 T615-2 19	67	0.8843	0.0426	11.9953	73.3591	6.3772	0.6381	0.1945	0	1.70147	95.1925
ORCHARD-N1 T615-2 14	62	0.7084	0.0475	12.0315	73.2382	6.2017	0.6122	0.2164	0.1033	1.92038	95.0796
ORCHARD-N1 T615-2 25	73	1.2826	0.0638	12.1548	74.8852	6.5693	0.6436	0.1295	0.0976	1.79414	97.6206
ORCHARD-N1 T615-2 29	77	0.7802	0.0587	12.3508	74.7025	6.26	0.6533	0.2482	0.0434	1.93021	97.0274
	Mean	1.04765	0.0559593	11.6209	71.3701	6.4789	0.644985	0.236759	0.0527407	1.83292	93.3409
	Std.Dev.	0.273131	0.0143508	0.278945	1.39951	0.204519	0.0332157	0.0609446	0.0428148	0.135224	1.6075
	Count: 27
Site 5W, Aldrich Sta.
Sample	Shard No.	Na2O	MgO	Al2O3	SiO2	K2O	CaO	TiO2	MnO	FeO	Total
BE-16-A T589-6 1	396	1.2025	0.0885	11.729	71.4868	5.8082	0.6186	0.2412	0.0439	1.735	92.9538
BE-16-A T589-6 2	397	1.4065	0.0574	11.5743	71.2288	5.8458	0.6495	0.2676	0.0282	1.8562	92.9144
BE-16-A T589-6 3	398	1.1252	0.0381	11.7337	72.0915	5.4897	0.6723	0.2699	0.0636	1.9868	93.4709
BE-16-A T589-6 4	399	1.3815	0.0591	11.6349	72.6089	5.9119	0.6218	0.3006	0.0227	1.7818	94.3233
BE-16-A T589-6 5	400	0.8654	0.0513	11.5965	70.8063	5.0341	0.6756	0.2932	0.0494	2.1071	91.479
BE-16-A T589-6 6	401	1.4162	0.0808	11.7708	71.7651	5.8191	0.6943	0.2273	0.0646	1.774	93.6123
BE-16-A T589-6 7	402	0.6608	0.0666	11.5633	71.8156	4.3697	0.6453	0.2049	0.0545	1.6776	91.0583
BE-16-A T589-6 8	403	1.3922	0.0481	11.5903	71.9052	5.9279	0.6514	0.2314	0.0414	1.7841	93.5721
BE-16-A T589-6 9	404	1.3238	0.0639	11.4974	71.2419	5.9206	0.6106	0.2432	0.0376	1.8783	92.8174
BE-16-A T589-6 10	405	0.946	0.0843	11.7282	71.3804	5.1106	0.6452	0.2108	0.0264	1.7993	91.9313
BE-16-A T589-6 11	406	1.6069	0.0471	11.7359	72.7589	5.9165	0.5698	0.2273	0.034	1.729	94.6255
BE-16-A T589-6 12	407	1.1864	0.0959	11.576	72.278	5.4958	0.5759	0.2475	0.0543	1.7454	93.2552
BE-16-A T589-6 13	408	1.263	0.0647	11.6096	70.9231	5.8329	0.6695	0.2676	0.0415	1.7648	92.4368
BE-16-A T589-6 14	409	1.124	0.0835	11.5535	71.4299	5.6803	0.5957	0.2756	0	1.8831	92.6257
BE-16-A T589-6 15	410	1.3733	0.0258	11.7529	71.6895	5.6591	0.6572	0.2939	0.0202	1.8269	93.2989
BE-16-A T589-6 16	411	1.0841	0.0444	11.6634	71.0271	5.4124	0.649	0.2857	0.0039	1.9126	92.0826
BE-16-A T589-6 17	412	0.9021	0.0392	11.6028	71.3766	5.2128	0.6421	0.2249	0.0387	1.8951	91.9343
BE-16-A T589-6 18	413	1.0372	0.0419	11.6687	71.4882	5.6584	0.6535	0.2391	0.0174	2.0658	92.8703
BE-16-A T589-6 19	414	0.9303	0.0632	11.7574	71.0002	5.0792	0.676	0.2653	0.0454	2.0011	91.8182
BE-16-A T589-6 20	415	0.9994	0.0794	11.7854	71.6785	5.1631	0.7128	0.2674	0.0589	2.013	92.7579
	Mean	1.16134	0.06116	11.6562	71.599	5.51741	0.644305	0.25422	0.03733	1.86085	92.7919
	Std. dev., 1 s	0.236721	0.019414	0.0868716	0.534975	0.412587	0.0368827	0.0283825	0.0183552	0.121391	0.911363
